# Supplementary material
Source: ML conference proceedings conference paper supplement (https://proceedings.neurips.cc/paper_files/paper/2022/hash/7c818dd40651b420873af70b8a790e3f-Abstract.html)
Supplement: Supplementary file 1 [file 7c818dd40651b420873af70b8a790e3f-Supplemental-Conference.zip]

Archive with 1 entries (1 files):
- Supplementary Material for Isometric 3D Adversarial Examples in the Physical World.pdf
